# Supplementary material for: Descriptive epidemiology of classical swine fever outbreaks in the period 2013-2018 in Colombia
Source: PLoS One. 2020 Jun 17;15(6):e0234490. doi: 10.1371/journal.pone.0234490 (PMC7299363; doi:10.1371/journal.pone.0234490)
Supplement: S1 File — (XLSX) [file pone.0234490.s001.xlsx]

## Sheet: CSV outbreaks 2013-2018
#	Year	Department	Susceptible animals	Diseases	Deads	Vaccinated animals	Vaccinated piglet <2 months old	Vaccinated males 2-6 months old	Vaccinated gilts 2-6 months old	Vaccinated males ≥6 months old	Vaccinated sows ≥6 months old	Piglet census <2 month old	male census 2-6 months old	gilts census 2-6 months old	male census ≥6 months old	Sows census ≥6 months old	Sicks piglet <2 month old	Sicks male 2-6 months old	Sicks gilts 2-6 months old	Sicks male ≥6 months old	Sicks sows ≥6 months old	Dead piglets <2 month old	Dead males 2-6 months old	Dead gilts 2-6 months old	Dead males ≥6 months old	Dead sows ≥6 months old	Farm type	Notification type	Fever	Conjunctivitis	Redness skin	Cyanosis	Depression	Grouping	Incoordination	weakness	Anorexy	Tremor	Convulsions	Pedal	Weakness of hind legs	Diarrhea	Postration	Nasal secretion	Cough	Hemorrhages	Abortions	Infected live pigs	Swill feeding
1	2013	La Guajira	15	6	6	15	0	7	5	0	3	0	7	5	0	3	0	3	3	0	0	0	3	3	0	0	Backyard	Voluntary sentinel	1	0	0	0	0	0	0	0	0	1	0	1	1	0	1	0	0	0	0	1	0
2	2013	Cesar	48	18	10	4	0	0	0	1	3	14	5	22	4	3	6	3	7	2	0	1	1	7	1	0	Backyard	Farmer	0	1	0	0	0	0	1	0	0	1	0	0	1	0	0	0	0	0	0	1	0
3	2013	Cesar	326	11	8	0	0	0	0	0	0	93	58	93	19	63	5	1	1	3	1	2	1	1	3	1	Backyard	Third parties	0	0	1	1	1	0	0	0	0	1	0	0	1	1	0	0	0	0	0	0	0
4	2013	Cesar	20	12	12	0	0	0	0	0	0	12	1	0	5	2	5	1	0	5	1	5	1	0	5	1	Backyard	Farmer	1	0	0	0	1	0	0	0	0	0	0	0	0	0	0	1	0	0	0	0	0
5	2013	Cesar	43	2	1	0	0	0	0	0	0	0	15	15	1	12	0	0	0	0	2	0	0	0	0	1	Backyard	Farmer	0	0	1	0	0	0	1	0	0	0	0	0	0	0	1	0	0	0	0	1	0
6	2013	Cesar	75	12	12	0	0	0	0	0	0	12	18	18	13	14	0	0	11	1	0	0	0	11	0	1	Backyard	Farmer	0	0	0	0	0	0	1	0	0	1	1	0	0	1	1	0	1	0	0	1	0
7	2013	Cesar	32	25	17	0	0	0	0	0	0	20	1	8	0	3	16	1	6	0	2	13	0	4	0	0	Backyard	Farmer	0	1	0	0	0	0	1	0	0	0	0	0	0	0	1	1	1	0	0	1	0
8	2013	Cesar	21	19	4	21	18	0	0	1	2	18	0	0	1	2	18	0	0	0	1	3	0	0	0	1	Backyard	Farmer	0	1	0	0	1	0	1	0	0	0	0	0	0	1	1	0	0	0	0	1	0
9	2013	Cesar	13	8	6	0	0	0	0	0	0	0	2	7	1	3	0	1	6	0	1	0	1	4	0	1	Backyard	Farmer	0	1	0	0	0	0	1	0	0	0	0	0	0	0	1	0	1	0	0	1	0
10	2014	Cesar	7	1	1	0	0	0	0	0	0	0	4	2	0	1	0	1	0	0	0	0	1	0	0	0	Backyard	Farmer	1	1	1	0	0	0	0	1	0	0	0	0	0	1	0	0	0	0	0	0	0
11	2014	Magdalena	588	333	309	0	0	0	0	0	0	235	106	135	41	71	158	61	83	10	21	156	55	79	6	13	Backyard	Farmer	0	1	0	1	0	1	0	0	0	0	0	0	0	0	0	1	0	0	0	1	0
12	2014	Magdalena	5	2	2	0	0	0	0	0	0	0	0	5	0	0	0	0	2	0	0	0	0	2	0	0	Backyard	Active surveillance	1	0	0	0	0	1	0	0	0	1	0	0	0	1	0	0	1	0	0	1	0
13	2014	Magdalena	3	2	1	0	0	0	0	0	0	0	0	2	1	0	0	0	2	0	0	0	0	1	0	0	Backyard	Active surveillance	1	0	0	0	1	0	0	0	0	1	0	0	0	0	0	0	0	0	0	1	0
14	2014	Magdalena	9	7	7	0	0	0	0	0	0	4	4	0	0	1	2	4	0	0	1	2	4	0	0	1	Backyard	Active surveillance	1	0	0	0	1	0	0	0	0	0	0	0	0	1	0	0	0	0	0	1	0
15	2014	Magdalena	15	8	5	0	0	0	0	0	0	0	0	0	7	8	0	0	0	0	8	0	0	0	0	5	Backyard	Active surveillance	0	1	0	0	0	0	1	0	0	0	0	0	0	0	0	1	1	0	0	1	0
16	2014	Magdalena	31	28	4	0	0	0	0	0	0	25	1	1	0	4	25	0	0	0	3	4	0	0	0	0	Backyard	Active surveillance	1	0	0	0	0	0	1	0	0	0	0	0	0	1	1	0	1	0	0	1	0
17	2014	Magdalena	26	13	7	0	0	0	0	0	0	11	7	4	0	4	2	7	3	0	1	0	4	3	0	0	Backyard	Active surveillance	1	0	0	0	0	0	1	0	0	0	0	0	0	0	1	1	0	0	0	1	0
18	2014	Magdalena	8	7	1	0	0	0	0	0	0	7	0	0	0	1	7	0	0	0	0	1	0	0	0	0	Backyard	Active surveillance	1	0	0	1	0	1	0	1	0	0	0	0	0	1	0	0	1	0	0	0	0
19	2014	Magdalena	10	5	1	0	0	0	0	0	0	0	1	4	1	4	0	0	4	1	0	0	0	1	0	0	Backyard	Active surveillance	1	1	0	1	0	0	0	1	0	0	0	0	0	0	0	0	1	0	0	1	0
20	2014	Cesar	19	8	5	0	0	0	0	0	0	16	0	2	0	1	6	0	2	0	0	3	0	2	0	0	Backyard	Farmer	1	1	0	0	0	1	1	0	0	0	0	0	1	0	1	1	1	0	0	1	0
21	2014	Bolivar	16	6	5	0	0	0	0	0	0	0	0	8	8	0	0	0	3	3	0	0	0	3	2	0	Backyard	Farmer	1	0	0	0	0	0	0	0	0	1	0	0	0	1	0	0	1	0	0	1	0
22	2014	Norte de Sder	8	3	3	8	7	0	0	0	1	7	0	0	0	1	3	0	0	0	0	3	0	0	0	0	Backyard	Farmer	1	0	1	0	0	0	0	0	0	0	1	0	0	0	0	0	0	0	0	0	0
23	2014	Magdalena	10	1	0	0	0	0	0	0	0	0	3	6	0	1	0	1	0	0	0	0	0	0	0	0	Backyard	Farmer	1	1	0	0	0	0	1	0	0	1	0	0	1	0	0	0	0	0	0	1	0
24	2014	Bolivar	7	3	1	0	0	0	0	0	0	5	0	0	0	2	3	0	0	0	0	1	0	0	0	0	Backyard	Farmer	1	1	1	0	0	1	0	0	0	0	0	0	0	1	0	0	1	0	0	0	0
25	2014	Cesar	16	12	12	0	0	0	0	0	0	0	6	7	2	1	0	5	7	0	0	0	5	7	0	0	Backyard	Farmer	1	1	0	0	0	1	0	0	0	0	0	0	1	0	0	0	0	0	0	0	1
26	2014	Cesar	1	1	0	0	0	0	0	1	0	0	0	0	1	0	0	0	0	1	0	0	0	0	0	0	Backyard	Active surveillance	1	1	1	0	1	0	0	0	0	0	0	0	0	0	0	0	0	0	0	0	0
27	2014	Norte de Sder	7	2	2	7	4	3	0	0	0	4	3	0	0	0	2	0	0	0	0	2	0	0	0	0	Backyard	Farmer	0	0	0	0	0	0	1	1	0	1	1	0	0	1	0	0	0	0	0	1	0
28	2014	Magdalena	14	4	4	0	0	0	0	0	0	6	5	1	0	2	2	2	0	0	0	2	2	0	0	0	Backyard	Farmer	1	1	0	1	0	1	0	0	0	1	0	0	0	1	0	0	0	0	0	1	0
29	2014	Magdalena	16	8	3	0	0	0	0	0	0	6	4	4	0	2	3	3	2	0	0	0	3	0	0	0	Backyard	Third parties	1	0	0	1	0	0	1	0	1	0	0	0	0	0	0	0	0	0	0	0	0
30	2014	Cesar	81	27	24	25	0	0	0	2	23	9	16	14	2	40	0	11	8	0	8	0	9	7	0	8	Backyard	Farmer	1	0	1	0	0	1	1	0	0	0	0	0	0	0	1	0	1	0	0	1	0
31	2014	Magdalena	174	121	121	0	0	0	0	0	0	33	29	33	59	20	32	17	31	36	5	32	17	31	36	5	Backyard	Active surveillance	1	0	0	0	0	0	1	0	0	0	0	0	0	1	0	0	0	0	0	1	0
32	2014	Magdalena	7	3	2	0	0	0	0	0	0	0	2	5	0	0	0	0	3	0	0	0	0	2	0	0	Backyard	Farmer	1	0	0	0	0	0	1	0	0	0	0	0	0	0	0	0	0	0	0	0	0
33	2014	Magdalena	66	40	35	0	0	0	0	0	0	13	20	23	0	10	13	12	15	0	0	13	10	12	0	0	Backyard	Active surveillance	1	0	0	0	0	0	1	0	0	0	0	0	0	1	0	0	0	0	0	1	0
34	2015	Cesar	5	2	2	0	0	0	0	0	0	0	3	2	0	0	0	2	0	0	0	0	2	0	0	0	Backyard	Voluntary sentinel	0	1	1	0	0	0	0	0	0	0	0	0	1	0	0	0	0	0	0	0	0
35	2015	Magdalena	37	15	15	0	0	0	0	0	0	17	11	5	0	4	1	9	3	0	2	1	9	3	0	2	Backyard	Third parties	1	0	0	0	0	0	0	0	0	1	0	0	0	0	0	1	1	0	0	1	0
36	2015	Magdalena	171	123	111	0	0	0	0	0	0	117	13	22	4	15	91	8	18	1	5	80	8	17	1	5	Backyard	Farmer	1	0	0	0	0	1	1	0	0	0	0	0	0	1	1	0	0	0	0	1	0
37	2015	Magdalena	41	17	11	0	0	0	0	0	0	23	5	9	0	4	9	2	5	0	1	7	1	2	0	1	Backyard	Third parties	1	0	0	0	0	0	1	1	0	0	0	0	0	0	0	0	1	0	0	1	0
38	2015	Magdalena	70	54	27	0	0	0	0	0	0	40	20	0	1	9	40	14	0	0	0	17	10	0	0	0	Backyard	Active surveillance	1	0	0	0	0	1	1	0	0	0	0	0	0	1	1	0	0	0	0	1	0
39	2015	Magdalena	79	43	35	0	0	0	0	0	0	44	16	12	1	6	24	7	8	0	4	20	6	6	0	3	Backyard	Third parties	1	0	0	0	0	0	1	0	0	0	0	0	0	0	0	0	1	0	0	0	0
40	2015	Cesar	22	6	6	0	0	0	0	0	0	0	22	0	0	0	0	6	0	0	0	0	6	0	0	0	Commercial	Farmer	1	0	0	1	0	0	0	0	0	0	0	0	0	0	0	0	0	0	0	1	0
41	2015	La Guajira	14	5	5	14	0	6	5	1	2	0	6	5	1	2	0	3	2	0	0	0	3	2	0	0	Backyard	Farmer	0	0	0	0	0	0	0	0	0	0	1	1	0	0	1	0	0	0	0	1	0
42	2015	Magdalena	17	15	9	0	0	0	0	0	0	10	0	6	0	1	9	0	6	0	0	5	0	4	0	0	Backyard	Voluntary sentinel	1	1	0	1	0	0	1	0	1	0	0	0	0	0	0	1	1	0	0	1	0
43	2015	Magdalena	23	7	4	0	0	0	0	0	0	0	6	14	2	1	0	3	1	2	1	0	3	1	0	0	Backyard	Third parties	1	0	0	0	0	0	0	0	0	1	0	0	0	0	0	0	0	1	0	1	0
44	2015	Cesar	39	22	22	0	0	0	0	0	0	7	24	2	2	4	0	18	2	0	2	0	18	2	0	2	Commercial	Farmer	0	0	0	0	1	0	0	0	1	0	0	0	0	0	0	0	1	0	0	0	0
45	2015	Magdalena	30	19	10	0	0	0	0	0	0	0	10	9	10	1	0	5	5	9	0	0	5	5	0	0	Backyard	Third parties	1	1	0	0	0	0	0	1	0	0	0	0	0	0	0	0	1	0	0	1	0
46	2015	Magdalena	14	11	10	0	0	0	0	0	0	11	1	0	0	2	9	0	0	0	2	9	0	0	0	1	Backyard	Voluntary sentinel	1	1	0	0	0	0	1	0	0	0	0	0	0	0	1	1	1	0	0	0	0
47	2015	Magdalena	27	13	6	0	0	0	0	0	0	14	6	3	1	3	8	4	1	0	0	3	2	1	0	0	Backyard	Third parties	1	1	0	0	0	0	0	0	0	0	0	0	0	0	0	0	1	0	0	1	0
48	2015	Cesar	98	11	8	90	51	12	8	3	16	59	12	8	3	16	11	0	0	0	0	8	0	0	0	0	Backyard	Active surveillance	1	0	0	0	0	0	1	0	0	0	0	0	0	0	0	0	1	0	0	0	0
49	2015	Magdalena	55	4	3	55	0	20	26	5	4	0	20	26	5	4	0	0	4	0	0	0	0	3	0	0	Backyard	Farmer	0	0	0	0	0	1	1	0	0	1	0	0	0	1	0	0	0	0	0	0	0
50	2015	Bolivar	12	8	6	0	0	0	0	0	0	0	5	5	0	2	0	5	3	0	0	0	3	3	0	0	Backyard	Farmer	0	0	0	0	0	0	1	1	0	1	0	0	0	0	0	0	1	0	0	1	0
51	2015	Atlantico	65	44	42	0	0	0	0	0	0	47	7	5	1	5	37	4	3	0	0	37	2	3	0	0	Backyard	Farmer	0	0	0	0	0	0	1	0	0	0	0	0	0	1	0	0	1	0	0	0	0
52	2015	Sucre	20	13	12	2	0	0	0	0	2	5	7	6	0	2	0	7	6	0	0	0	6	6	0	0	Backyard	Voluntary sentinel	1	0	1	0	1	0	1	0	0	1	0	0	0	1	0	0	0	0	0	0	0
53	2015	Magdalena	24	15	10	0	0	0	0	0	0	21	0	0	1	2	15	0	0	0	0	10	0	0	0	0	Backyard	Farmer	1	1	1	0	0	0	0	0	0	1	0	0	0	0	0	1	1	1	0	1	0
54	2015	Sucre	29	4	2	0	0	0	0	0	0	5	4	9	2	9	0	1	1	1	1	0	1	0	0	1	Backyard	Farmer	1	0	0	0	0	0	1	0	0	1	0	0	0	0	0	0	1	0	0	1	0
55	2015	Bolivar	25	11	11	0	0	0	0	0	0	4	12	6	0	3	0	7	3	0	1	0	7	3	0	1	Backyard	Voluntary sentinel	1	1	1	0	0	1	0	0	0	0	0	0	0	0	1	0	0	0	0	0	0
56	2015	Sucre	14	6	6	11	0	6	4	0	1	3	6	4	0	1	0	5	1	0	0	0	5	1	0	0	Backyard	Farmer	1	0	0	0	1	0	1	0	0	0	0	0	0	0	0	0	0	0	0	1	0
57	2015	Cesar	88	1	0	87	29	20	21	1	16	29	20	21	2	16	0	0	0	1	0	0	0	0	0	0	Backyard	Farmer	1	0	1	1	0	0	1	0	0	0	0	0	1	0	0	0	0	0	0	1	0
58	2015	Cesar	10	4	4	2	0	2	0	0	0	0	8	2	0	0	0	4	0	0	0	0	4	0	0	0	Backyard	Voluntary sentinel	1	0	0	0	1	1	1	0	0	0	0	0	0	1	0	0	0	0	0	0	0
59	2015	Cesar	13	2	2	0	0	0	0	0	0	8	1	2	1	1	2	0	0	0	0	2	0	0	0	0	Backyard	Third parties	0	0	0	0	0	0	0	0	0	0	0	0	0	0	1	0	1	0	0	0	0
60	2015	Sucre	10	9	7	0	0	0	0	0	0	0	5	3	1	1	0	5	3	1	0	0	3	3	1	0	Backyard	Third parties	1	0	0	0	1	0	1	0	0	0	0	0	0	1	0	0	1	0	0	1	0
61	2015	Sucre	10	3	3	0	0	0	0	0	0	9	0	0	0	1	3	0	0	0	0	3	0	0	0	0	Backyard	Farmer	1	0	1	0	0	0	1	0	0	1	0	0	1	1	1	0	0	0	0	1	0
62	2015	Magdalena	11	6	6	11	0	4	3	1	3	0	4	3	1	3	0	3	3	0	0	0	3	3	0	0	Backyard	Farmer	0	0	1	0	0	0	1	0	0	1	0	0	0	0	1	0	0	0	0	0	0
63	2015	Sucre	10	3	1	2	0	0	0	0	2	0	5	3	0	2	0	2	1	0	0	0	1	0	0	0	Backyard	Farmer	0	1	0	0	0	0	1	0	0	0	0	0	0	0	0	0	1	0	0	1	0
64	2015	Atlantico	26	4	3	26	0	12	9	1	4	0	12	9	1	4	0	3	1	0	0	0	2	1	0	0	Backyard	Farmer	0	0	1	0	0	0	0	0	0	1	0	0	0	1	0	0	0	0	0	0	0
65	2015	Sucre	16	14	10	2	0	0	0	0	2	0	8	6	0	2	0	8	6	0	0	0	6	4	0	0	Backyard	Active surveillance	1	0	1	0	1	0	1	0	0	0	0	0	0	0	1	0	1	0	0	0	0
66	2015	Sucre	30	18	13	0	0	0	0	0	0	0	17	10	0	3	0	14	4	0	0	0	10	3	0	0	Backyard	Farmer	1	0	0	0	1	0	1	0	0	1	0	0	0	0	0	0	0	0	0	0	0
67	2015	Sucre	43	33	32	0	0	0	0	0	0	33	4	2	0	4	29	0	2	0	2	29	0	1	0	2	Backyard	Active surveillance	1	0	1	0	1	0	1	0	0	0	0	0	0	1	0	0	0	0	0	1	0
68	2015	Bolivar	15	5	3	0	0	0	0	0	0	0	10	4	0	1	0	3	2	0	0	0	2	1	0	0	Backyard	Voluntary sentinel	0	0	0	1	0	1	0	1	0	0	0	0	0	1	0	0	1	0	0	1	0
69	2015	Magdalena	20	6	3	0	0	0	0	0	0	0	8	9	0	3	0	4	2	0	0	0	2	1	0	0	Backyard	Farmer	1	0	0	0	0	0	0	0	0	1	0	0	0	0	0	0	1	0	0	1	0
70	2015	Cesar	14	2	2	0	0	0	0	0	0	0	7	4	0	3	0	2	0	0	0	0	2	0	0	0	Backyard	Farmer	1	0	0	0	0	0	0	0	0	1	0	0	0	0	0	0	1	0	0	1	0
71	2015	Magdalena	62	16	14	0	0	0	0	0	0	24	16	12	2	8	16	0	0	0	0	14	0	0	0	0	Backyard	Third parties	1	1	0	0	0	0	1	0	0	1	0	0	0	0	0	0	1	0	0	1	0
72	2015	Cesar	35	10	10	35	0	21	12	0	2	0	21	12	0	2	0	5	5	0	0	0	5	5	0	0	Backyard	Farmer	0	0	1	0	0	0	1	0	0	0	0	0	0	0	1	0	0	0	0	0	0
73	2015	Bolivar	41	26	20	0	0	0	0	0	0	15	9	11	3	3	7	7	8	2	2	5	6	7	1	1	Backyard	Farmer	1	1	1	0	0	0	1	0	0	0	0	0	0	0	1	0	0	1	0	1	0
74	2015	Magdalena	25	5	2	0	0	0	0	0	0	0	8	12	1	4	0	3	2	0	0	0	2	0	0	0	Backyard	Farmer	1	1	1	0	0	0	1	0	0	0	0	0	0	0	0	0	0	0	0	1	0
75	2015	Bolivar	41	12	11	0	0	0	0	0	0	10	12	7	3	9	6	4	0	1	1	6	3	0	1	1	Backyard	Farmer	1	1	1	0	0	0	0	0	0	0	0	0	0	1	0	1	1	0	1	0	0
76	2015	Magdalena	15	4	3	0	0	0	0	0	0	0	12	2	1	0	0	4	0	0	0	0	3	0	0	0	Backyard	Farmer	1	1	1	0	0	0	1	0	0	1	0	0	0	0	0	0	0	0	0	1	0
77	2015	Atlantico	43	24	24	14	0	2	8	0	4	9	10	20	0	4	8	6	10	0	0	8	6	10	0	0	Backyard	Farmer	1	1	0	0	0	0	1	0	0	1	0	0	0	1	0	0	0	0	0	0	0
78	2015	Bolivar	24	14	4	0	0	0	0	0	0	18	4	0	0	2	14	0	0	0	0	4	0	0	0	0	Backyard	Voluntary sentinel	1	0	0	0	0	1	1	0	0	1	0	0	0	1	0	0	0	0	0	1	0
79	2015	Bolivar	37	14	9	0	0	0	0	0	0	10	12	12	1	2	3	1	7	1	2	3	0	4	0	2	Backyard	Voluntary sentinel	1	1	1	0	0	0	1	0	0	0	0	0	0	0	1	1	0	0	0	1	0
80	2015	Bolivar	12	4	2	0	0	0	0	0	0	0	5	7	0	0	0	1	3	0	0	0	0	2	0	0	Backyard	Farmer	1	0	0	0	0	0	1	1	0	1	0	0	0	0	0	0	0	0	0	1	0
81	2015	Magdalena	7	4	3	0	0	0	0	0	0	6	0	0	0	1	3	0	0	0	1	2	0	0	0	1	Backyard	Third parties	1	0	0	0	0	0	1	0	0	0	0	0	0	1	1	0	0	0	0	1	0
82	2015	Bolivar	120	72	72	0	0	0	0	0	0	0	0	0	58	62	0	0	0	37	35	0	0	0	37	35	Backyard	Farmer	1	1	1	0	0	0	1	0	0	0	0	0	0	0	1	0	0	1	0	1	0
83	2015	Sucre	22	10	6	1	0	0	0	0	1	0	11	10	0	1	0	6	4	0	0	0	3	3	0	0	Backyard	Voluntary sentinel	1	0	0	0	1	0	1	0	0	0	0	0	0	1	0	0	0	0	0	0	0
84	2015	Magdalena	20	6	5	0	0	0	0	0	0	0	10	9	0	1	0	3	3	0	0	0	3	2	0	0	Backyard	Active surveillance	0	0	0	0	0	0	1	0	0	1	0	0	0	0	0	0	1	0	0	1	0
85	2015	Bolivar	66	35	16	0	0	0	0	0	0	10	18	17	4	17	0	18	17	0	0	0	13	3	0	0	Backyard	Third parties	1	0	0	0	0	0	1	0	0	0	0	0	0	1	0	0	1	0	0	1	0
86	2015	Santander	118	109	63	0	0	0	0	0	0	35	20	25	4	34	35	20	20	0	34	29	10	10	0	14	Commercial	Third parties	1	0	1	0	0	0	0	0	0	0	0	0	0	0	0	1	0	1	0	0	0
87	2015	Santander	14	7	2	0	0	0	0	0	0	0	7	7	0	0	0	5	2	0	0	0	2	0	0	0	Backyard	Farmer	1	0	0	0	1	0	0	0	0	0	0	0	0	0	0	0	1	0	0	1	0
88	2015	Santander	2	1	0	0	0	0	0	0	0	0	2	0	0	0	0	1	0	0	0	0	0	0	0	0	Backyard	Active surveillance	1	0	0	0	1	0	0	0	0	1	0	0	0	0	0	0	0	0	0	1	0
89	2015	Bolivar	76	58	58	0	0	0	0	0	0	70	0	0	0	6	56	0	0	0	2	56	0	0	0	2	Backyard	Voluntary sentinel	0	0	0	1	0	1	0	0	0	0	0	0	0	1	0	0	0	0	0	1	0
90	2015	Cesar	10	9	5	0	0	0	0	0	0	9	0	0	0	1	9	0	0	0	0	5	0	0	0	0	Backyard	Farmer	0	1	1	1	0	0	0	0	0	0	0	0	0	0	1	0	0	0	0	0	0
91	2015	Cesar	26	21	21	0	0	0	0	0	0	14	10	0	1	1	14	7	0	0	0	14	7	0	0	0	Backyard	Farmer	1	0	1	1	0	0	0	0	0	0	0	0	0	1	1	0	0	0	0	0	0
92	2015	Bolivar	15	5	5	0	0	0	0	0	0	0	10	1	1	3	0	5	0	0	0	0	5	0	0	0	Backyard	Third parties	0	0	0	1	0	0	1	0	0	0	0	0	0	1	0	0	0	0	0	1	0
93	2015	Cesar	150	30	30	55	30	0	0	12	13	30	25	70	12	13	0	15	15	0	0	0	15	15	0	0	Commercial	Farmer	0	0	0	0	0	0	0	1	0	0	0	0	0	0	0	0	1	0	0	0	0
94	2015	Bolivar	13	7	3	0	0	0	0	0	0	8	4	0	0	1	5	1	0	0	1	3	0	0	0	0	Backyard	Voluntary sentinel	1	1	0	1	0	0	1	0	0	0	0	0	0	0	1	0	1	0	0	1	0
95	2015	Magdalena	37	10	5	0	0	0	0	0	0	15	5	13	1	3	0	0	10	0	0	0	0	5	0	0	Backyard	Voluntary sentinel	1	0	1	0	0	0	1	0	0	0	0	0	0	0	0	0	0	0	0	0	0
96	2015	Bolivar	12	2	0	0	0	0	0	0	0	11	0	0	0	1	2	0	0	0	0	0	0	0	0	0	Backyard	Farmer	0	0	0	1	0	1	1	0	0	0	0	0	0	1	0	0	0	0	0	1	0
97	2016	Bolivar	8	3	2	6	0	5	1	0	0	0	7	1	0	0	0	3	0	0	0	0	2	0	0	0	Backyard	Voluntary sentinel	1	1	1	1	0	1	1	0	0	1	0	0	0	0	1	0	0	0	0	0	0
98	2016	Cordoba	17	2	2	0	0	0	0	0	0	0	4	8	1	4	0	1	1	0	0	0	1	1	0	0	Backyard	Farmer	0	0	0	0	1	0	1	0	0	1	0	0	0	0	0	0	0	0	0	1	0
99	2016	Bolivar	796	580	580	0	0	0	0	0	0	300	182	143	14	157	248	138	94	8	92	248	138	94	8	92	Backyard	Third parties	1	0	0	0	1	0	1	0	0	0	0	0	0	1	0	0	1	0	0	1	0
100	2016	Cordoba	2	2	0	0	0	0	0	0	0	0	1	1	0	0	0	1	1	0	0	0	0	0	0	0	Backyard	Active surveillance	1	0	0	0	1	0	0	0	0	0	0	0	0	0	1	1	1	0	0	1	0
101	2016	Cordoba	23	3	0	0	0	0	0	0	0	0	0	14	0	9	0	0	3	0	0	0	0	0	0	0	Backyard	Farmer	0	0	0	1	1	0	0	0	0	1	0	0	0	0	1	0	1	0	0	0	0
102	2016	Cordoba	7	3	1	2	0	0	0	0	2	0	2	3	0	2	0	1	2	0	0	0	1	0	0	0	Backyard	Active surveillance	1	0	0	1	1	0	0	0	0	1	0	0	0	0	1	1	1	0	0	1	0
103	2016	Cordoba	7	2	2	0	0	0	0	0	0	5	0	0	0	2	2	0	0	0	0	2	0	0	0	0	Backyard	Active surveillance	1	0	0	0	1	0	0	0	0	1	0	0	0	1	1	0	1	0	0	1	0
104	2016	Bolivar	21	11	11	0	0	0	0	0	0	20	0	0	0	1	11	0	0	0	0	11	0	0	0	0	Backyard	Farmer	0	0	0	1	0	1	0	1	0	0	0	0	0	0	0	0	1	0	0	1	0
105	2016	Atlantico	6	5	2	0	0	0	0	0	0	5	1	0	0	0	5	0	0	0	0	2	0	0	0	0	Backyard	Voluntary sentinel	1	0	1	0	0	0	0	0	0	1	0	0	1	0	0	0	0	0	0	1	0
106	2016	Magdalena	36	20	17	0	0	0	0	0	0	0	19	7	8	2	0	9	7	4	0	0	8	5	4	0	Backyard	Farmer	1	0	0	0	0	0	0	0	0	1	0	0	0	0	0	0	1	0	0	1	0
107	2016	Cordoba	33	28	23	10	0	1	4	2	3	0	24	4	2	3	0	24	4	0	0	0	23	0	0	0	Backyard	Farmer	0	0	0	0	1	0	0	0	0	0	0	0	1	0	0	1	1	0	0	1	0
108	2016	Atlantico	9	6	4	0	0	0	0	0	0	0	3	5	0	1	0	1	5	0	0	0	1	3	0	0	Backyard	Farmer	0	0	0	0	0	1	1	0	0	0	0	0	0	1	0	0	0	0	0	1	0
109	2016	Cordoba	14	6	3	0	0	0	0	0	0	11	0	0	0	3	6	0	0	0	0	3	0	0	0	0	Backyard	Farmer	1	0	0	1	1	0	0	0	0	1	0	0	0	0	1	1	0	0	0	1	0
110	2016	Atlantico	7	6	2	0	0	0	0	0	0	6	0	0	0	1	6	0	0	0	0	2	0	0	0	0	Backyard	Third parties	0	0	1	0	0	0	1	0	0	0	1	0	0	0	0	0	0	0	0	0	0
111	2016	Magdalena	15	5	5	0	0	0	0	0	0	4	4	2	4	1	0	0	2	3	0	0	0	2	3	0	Backyard	Farmer	1	1	1	0	0	0	0	0	0	0	0	0	0	0	1	0	1	0	0	0	0
112	2016	Cordoba	26	16	15	0	0	0	0	0	0	0	23	0	0	3	0	16	0	0	0	0	15	0	0	0	Backyard	Farmer	0	0	0	1	1	0	0	0	0	1	0	0	0	0	1	0	0	0	0	1	0
113	2016	Cesar	16	10	10	16	0	8	8	0	0	0	8	8	0	0	0	6	4	0	0	0	6	4	0	0	Backyard	Farmer	1	0	1	1	0	0	1	0	0	0	0	0	1	0	0	0	0	0	0	0	0
114	2016	Cordoba	15	12	12	15	0	10	5	0	0	0	10	5	0	0	0	10	2	0	0	0	10	2	0	0	Backyard	Third parties	0	0	0	0	1	0	0	0	1	0	0	0	0	0	1	1	1	0	0	1	0
115	2016	Bolivar	29	20	20	0	0	0	0	0	0	7	10	7	1	4	7	8	5	0	0	7	8	5	0	0	Backyard	Farmer	1	0	0	0	0	1	0	0	0	1	0	0	0	1	0	0	0	0	0	0	0
116	2016	Cordoba	23	7	7	12	0	6	2	2	2	10	6	2	2	3	7	0	0	0	0	7	0	0	0	0	Backyard	Farmer	0	0	0	0	1	0	0	0	0	0	0	0	0	1	0	0	0	0	0	1	0
117	2016	Magdalena	15	6	5	2	0	0	0	0	2	0	7	6	0	2	0	3	3	0	0	0	3	2	0	0	Backyard	Voluntary sentinel	0	1	0	0	0	0	0	0	1	0	0	0	0	1	0	0	1	0	0	0	0
118	2016	Magdalena	61	31	31	0	0	0	0	0	0	18	24	8	2	9	4	22	2	1	2	4	22	2	1	2	Backyard	Farmer	1	1	0	0	0	0	0	0	0	0	0	0	0	1	1	0	0	0	0	0	0
119	2016	Magdalena	18	5	2	0	0	0	0	0	0	6	2	5	4	1	0	2	3	0	0	0	1	1	0	0	Backyard	Third parties	0	0	0	0	0	0	1	0	0	0	0	0	0	0	1	1	1	0	0	0	0
120	2016	Cordoba	36	6	6	14	0	3	8	0	3	10	6	13	1	6	3	3	0	0	0	3	3	0	0	0	Backyard	Farmer	1	0	0	0	1	0	0	0	0	1	0	0	0	0	1	0	1	0	0	1	0
121	2016	Norte de Sder	36	6	3	5	0	0	3	1	1	0	15	19	1	1	0	1	5	0	0	0	0	3	0	0	Commercial	Voluntary sentinel	0	0	0	1	0	0	0	0	0	0	0	0	0	0	1	0	1	0	0	0	0
122	2016	Norte de Sder	2	1	1	2	0	2	0	0	0	0	2	0	0	0	0	1	0	0	0	0	1	0	0	0	Backyard	Active surveillance	1	0	0	0	0	0	0	0	0	0	0	0	0	1	1	0	1	0	0	1	0
123	2016	Atlantico	12	8	8	0	0	0	0	0	0	0	2	10	0	0	0	1	7	0	0	0	1	7	0	0	Backyard	Farmer	1	0	0	0	0	0	1	1	0	0	0	0	0	1	1	0	0	0	0	1	0
124	2016	Norte de Sder	3	3	1	0	0	0	0	0	0	0	2	1	0	0	0	2	1	0	0	0	0	1	0	0	Backyard	Voluntary sentinel	0	0	0	0	0	0	0	0	0	0	0	0	0	1	1	0	1	0	0	1	0
125	2017	Atlantico	47	28	9	0	0	0	0	0	0	0	37	7	1	2	0	28	0	0	0	0	9	0	0	0	Backyard	Voluntary sentinel	1	0	1	0	0	0	1	0	0	1	0	1	0	1	0	0	1	0	0	1	0
126	2017	Atlantico	1740	70	50	490	0	0	60	4	426	1250	0	60	4	426	70	0	0	0	0	50	0	0	0	0	Commercial	Third parties	1	0	0	0	0	0	0	0	0	0	0	0	0	0	0	0	1	0	0	0	0
127	2017	Atlantico	25	25	3	10	0	0	0	4	6	0	10	5	4	6	0	10	5	4	6	0	1	2	0	0	Commercial	Farmer	0	1	0	0	0	0	1	0	0	0	0	0	0	1	0	0	1	0	0	1	0
128	2017	Atlantico	86	11	9	86	7	25	28	2	24	7	25	28	2	24	0	5	6	0	0	0	4	5	0	0	Backyard	Farmer	0	1	1	0	0	0	1	1	0	0	0	0	0	0	1	0	0	0	0	0	0
129	2017	Atlantico	79	10	6	0	0	0	0	0	0	0	40	39	0	0	0	6	4	0	0	0	3	3	0	0	Backyard	Farmer	1	0	0	0	0	0	1	0	0	1	0	0	0	0	1	0	0	0	0	1	0
130	2017	Sucre	22	19	19	13	0	0	3	0	10	0	0	3	0	19	0	0	0	0	19	0	0	0	0	19	Backyard	Farmer	1	0	1	1	1	0	1	0	0	0	0	0	0	1	0	1	0	0	0	1	0
131	2017	Magdalena	8	5	3	0	0	0	0	0	0	0	7	0	0	1	0	5	0	0	0	0	3	0	0	0	Backyard	Voluntary sentinel	1	0	0	1	0	1	1	0	0	1	0	0	0	1	0	0	0	0	0	1	0
132	2017	Cesar	7	3	3	7	0	5	1	1	0	0	5	1	1	0	0	3	0	0	0	0	3	0	0	0	Backyard	Voluntary sentinel	1	1	0	1	0	0	1	0	0	0	0	0	0	0	0	0	0	0	0	0	0
133	2018	Cordoba	48	19	10	0	0	0	0	0	0	14	16	14	0	4	4	10	5	0	0	4	3	3	0	0	Backyard	Voluntary sentinel	0	0	0	0	1	0	0	0	0	1	0	0	0	1	1	1	1	0	0	0	0
134	2018	Bolivar	39	31	28	0	0	0	0	0	0	31	1	6	0	1	27	1	3	0	0	24	1	3	0	0	Backyard	Third parties	1	1	0	0	1	1	1	0	1	0	0	0	0	0	1	1	0	0	0	0	0
[truncated: 6 more columns]
